# Supplementary material
Source: PubMed Central journal article supplement (PMC3410961)

**Supplemental Figure 1.** Recruitment flowchart<sup>2</sup>

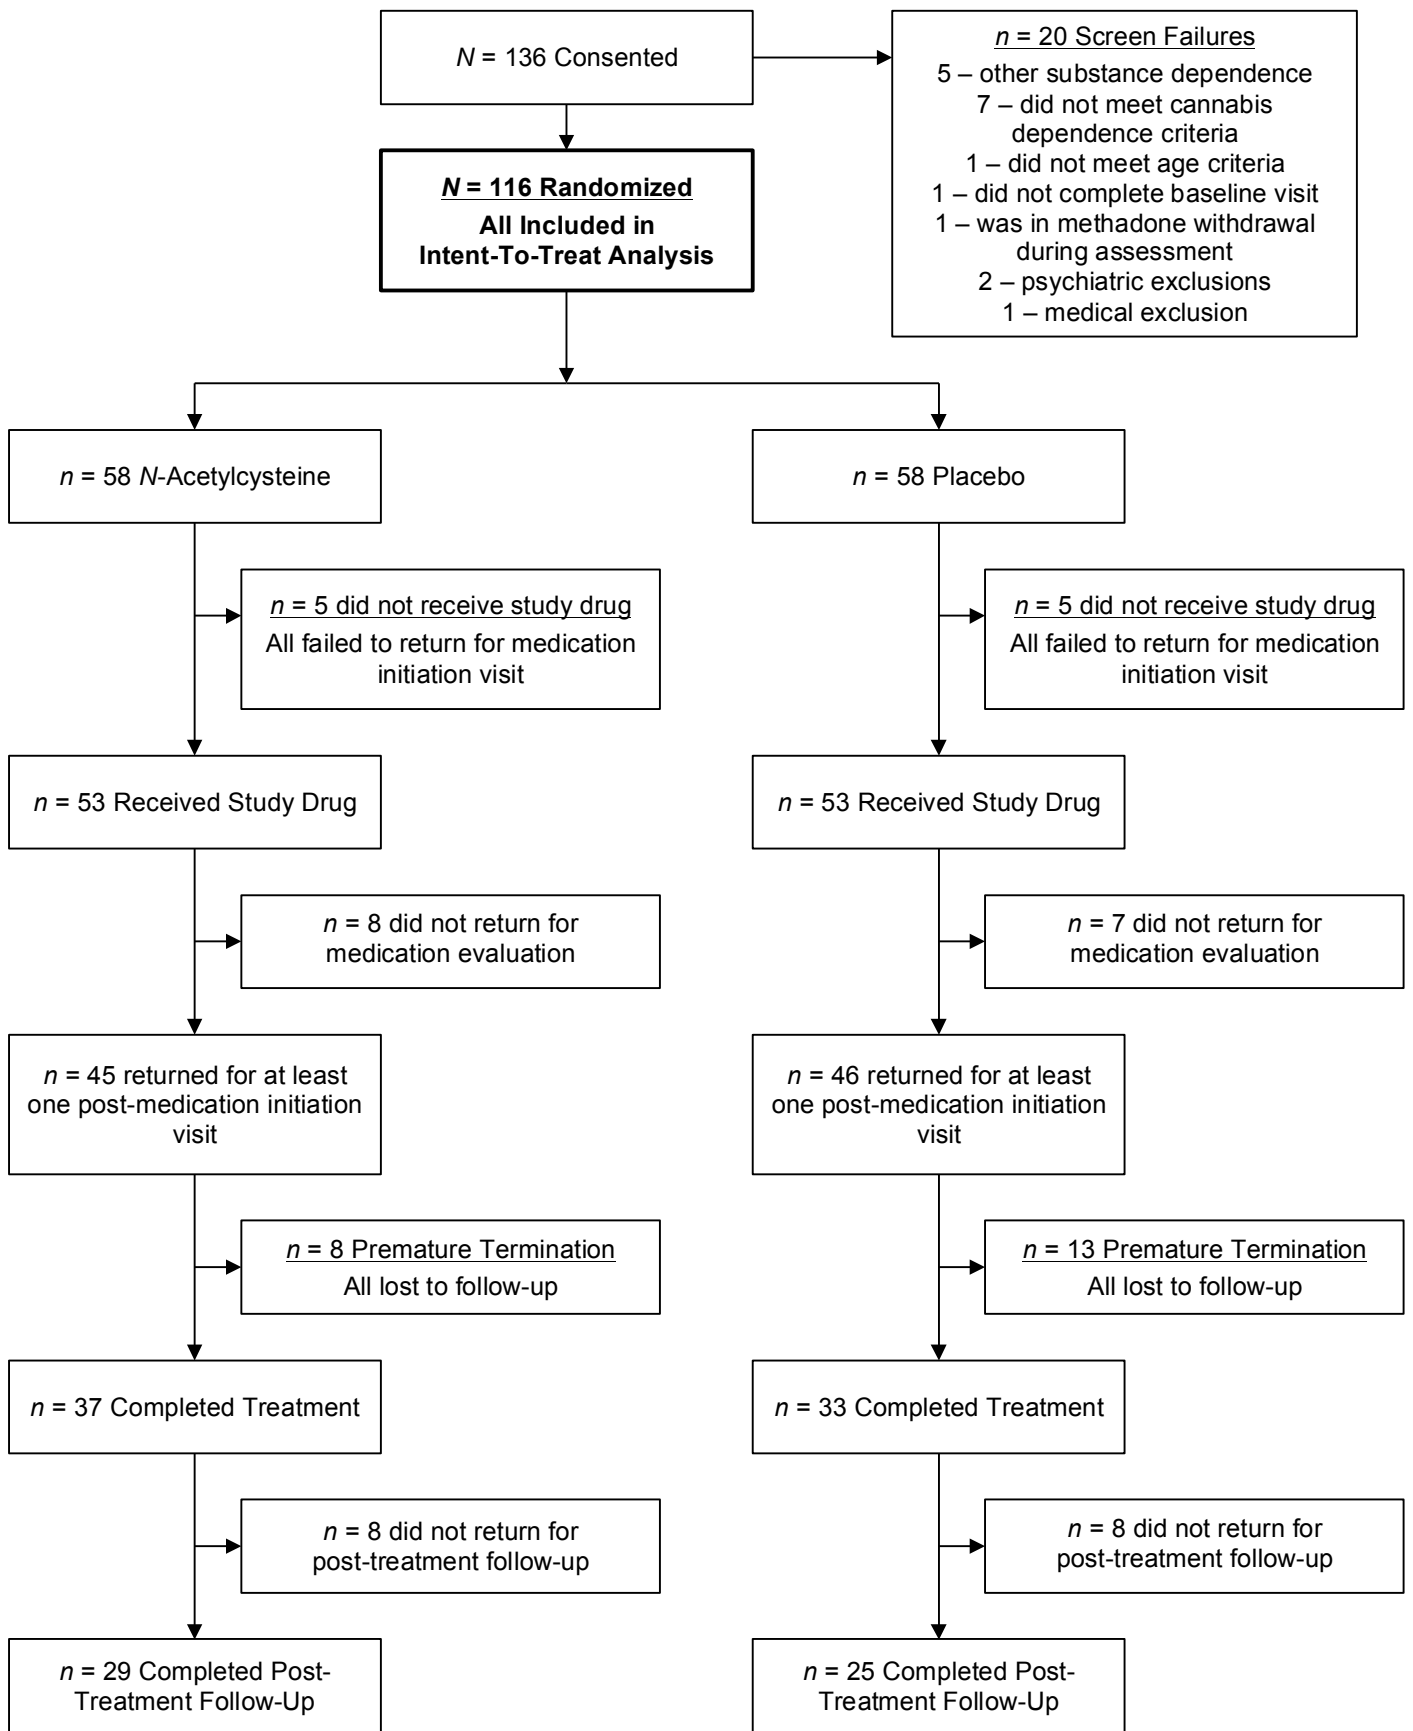

Supplement: NIHMS374807-supplement-01.pdf [file NIHMS374807-supplement-01.pdf]
